# Supplementary material for: Synthesis, structure and enhanced photoluminescence properties of two robust, water stable calcium and magnesium coordination networks
Source: Royal Society of Chemistry journal article supplement (doi:10.1039/c5dt03705k), 2015-01-01
Supplement: c5dt03705k1.pdf [file c5dt03705k1.pdf]

Supporting Information

**Synthesis, structures and enhanced photoluminescence properties of  
two robust, water stable calcium and magnesium coordination  
networks**

Feng Xu,<sup>a,b</sup> Hao Wang,<sup>a</sup> Simon J. Teat,<sup>c</sup> Wei Liu,<sup>a</sup> Qibin Xia,<sup>a,b</sup> Zhong Li<sup>b</sup> and Jing Li<sup>\*a</sup>

<sup>a</sup>Department of Chemistry and Chemical Biology, Rutgers University, Piscataway, New Jersey,  
08854, USA. E-mail: Jingli@rutgers.edu

<sup>b</sup>School of Chemistry and Chemical Engineering, South China University of Technology,  
Guangzhou, 510641, P.R. China

<sup>c</sup>Advanced Light Source, Lawrence Berkeley National Laboratory, Berkeley, California 94720,  
USA

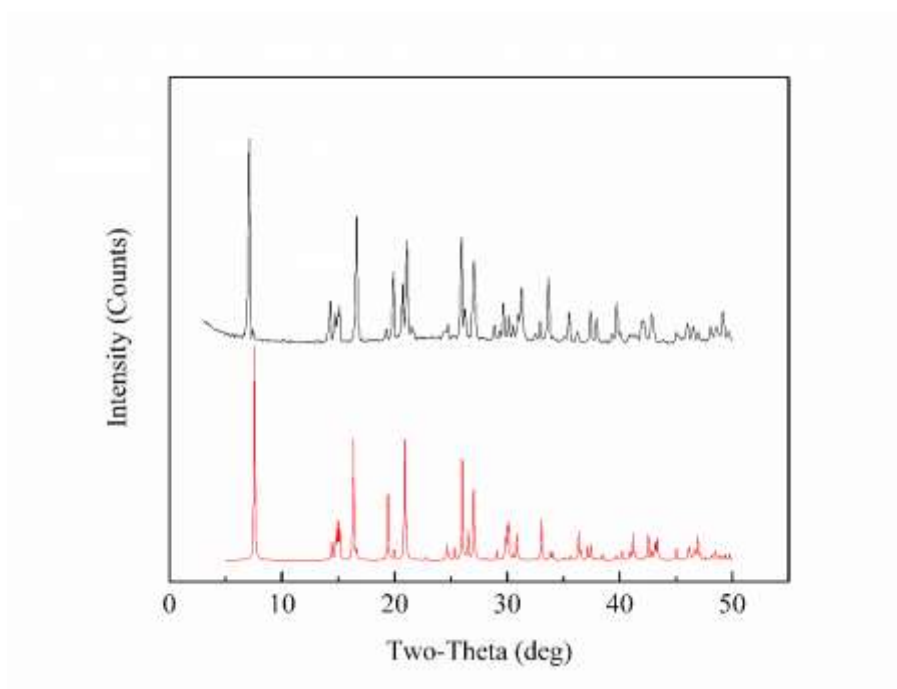

**Fig. S1.** PXRD patterns of the as-made compound **1** (top) and simulated from single crystal data (bottom).

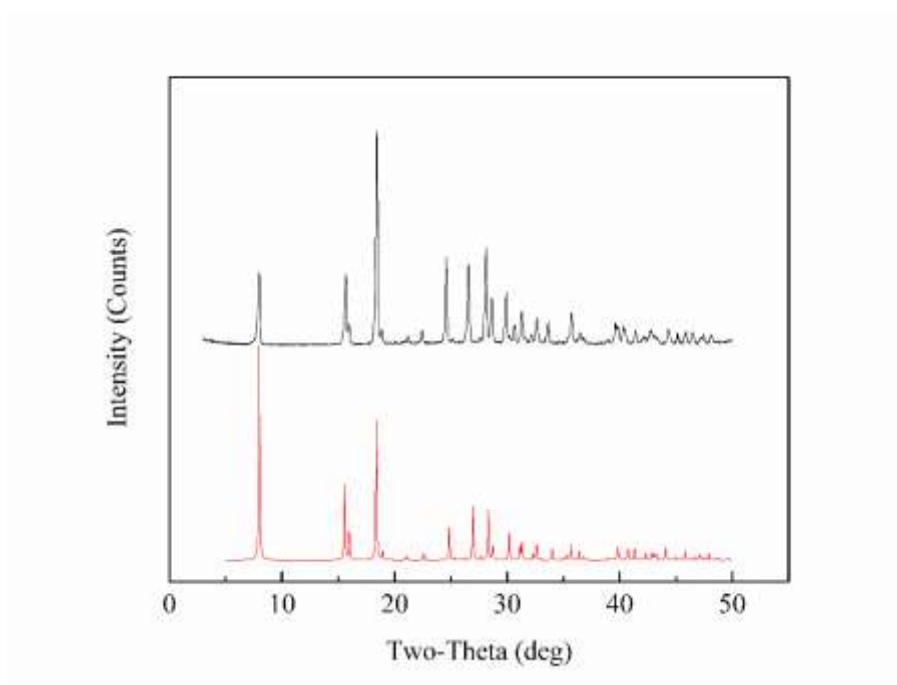

**Fig. S2.** PXRD patterns of the as-made compound **2** (top) and simulated from single crystal data (bottom).

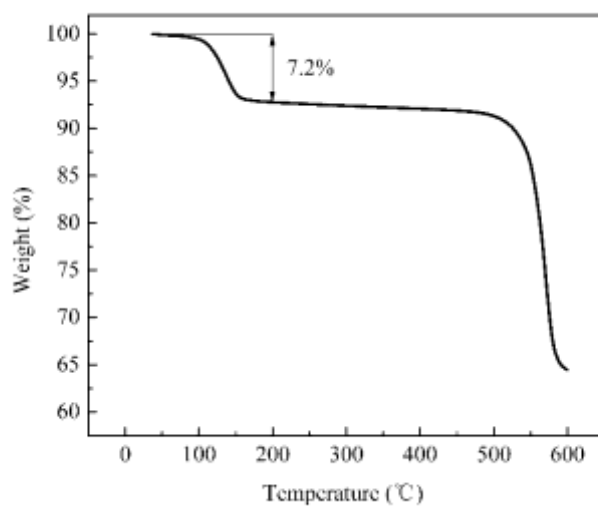

**Fig. S3.** The TGA plot of compound **1**.

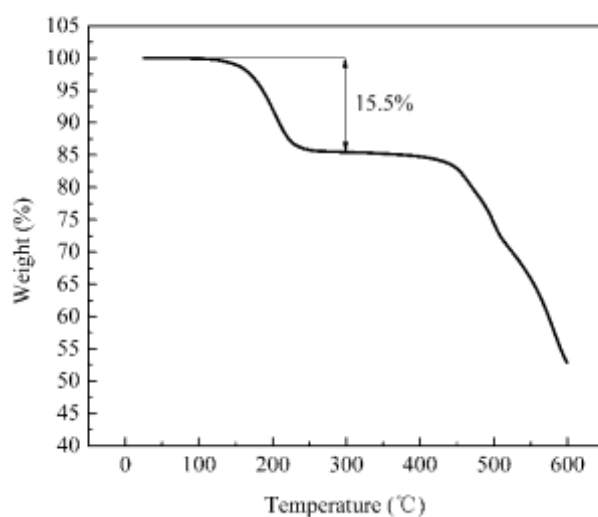

**Fig. S4.** The TGA plot of compound **2**.

**Table S1.** Internal quantum yield values of compounds **1** and **2**.

| Compound                  | QY ( $\lambda_{\text{ex}}$ : 365 nm) | QY ( $\lambda_{\text{ex}}$ : 450 nm) |
|---------------------------|--------------------------------------|--------------------------------------|
| Ca(cca)·H <sub>2</sub> O  | 15.1 ± 0.1                           | 13 ± 0.2                             |
| Mg(cca)·2H <sub>2</sub> O | 16.2 ± 0.2                           | 9.4 ± 0.1                            |
| H <sub>2</sub> cca        | 4.2 ± 0.1                            | ---                                  |
